# Supplementary material for: Field Plant Monitoring from Macro to Micro Scale: Feasibility and Validation of Combined Field Monitoring Approaches from Remote to in Vivo to Cope with Drought Stress in Tomato
Source: MDPI journal article supplement (doi:10.3390/plants12223851), 2023-11-14
Supplement: s1 [file s1]

# Supplementary Materials

## Field Plant Monitoring from Macro to Micro Scale: Feasibility and Validation of Combined Field Monitoring Approaches from Remote to in Vivo to Cope with Drought Stress in Tomato

Filippo Vurro <sup>1</sup>, Michele Croci <sup>2</sup>, Giorgio Impollonia <sup>2,\*</sup>, Edoardo Marchetti <sup>1</sup>, Adrian Gracia-Romero <sup>3,4</sup>,  
Manuele Bettelli <sup>1</sup>, José Luis Araus <sup>3</sup>, Stefano Amaducci <sup>2</sup> and Michela Janni <sup>1,\*</sup>

<sup>1</sup> Istituto dei Materiali per l'Elettronica e il Magnetismo (IMEM-CNR), Parco Area delle Scienze 37/A, 43124 Parma, Italy; filippo.vurro@imem.cnr.it (F.V.); manuele.bettelli@imem.cnr.it (M.B.)

<sup>2</sup> Department of Sustainable Crop Production, Università Cattolica del Sacro Cuore, Via Emilia Parmense, 84, 29122 Piacenza, Italy; michele.croci@unicatt.it (M.C.); stefano.amaducci@unicatt.it (S.A.)

<sup>3</sup> Integrative Crop Ecophysiology Group, Agrotecnio—Center for Research in Agrotechnology, Plant Physiology Section, Faculty of Biology, University of Barcelona, 08028 Barcelona, Spain; adrian.gracia@irta.cat (A.G.-R.); jaraus@ub.edu (J.L.A.)

<sup>4</sup> Field Crops Program, Institute for Food and Agricultural Research and Technology (IRTA), 251981 Lleida, Spain

\* Correspondence: giorgio.impollonia@unicatt.it (G.I.); michela.janni@imem.cnr.it (M.J.)

**Table S1.** Field operations performed in 2019.

| <b>DAT</b> | <b>Operation</b>                                                          |
|------------|---------------------------------------------------------------------------|
| 30         | Bioristor insertion                                                       |
| 36         | AMNITRA 34.3 (NH <sub>4</sub> <sup>+</sup> NO <sub>3</sub> <sup>-</sup> ) |
| 43         | AMNITRA 34.3 (NH <sub>4</sub> <sup>+</sup> NO <sub>3</sub> <sup>-</sup> ) |
| 43         | Differential irrigation                                                   |
| 53         | KNO <sub>3</sub> 13-0-46                                                  |
| 53         | Soil probe placement                                                      |
| 56         | UAV flight                                                                |
| 62         | UAV flight                                                                |
| 63         | KNO <sub>3</sub> 13-0-46                                                  |
| 63         | Ridomil Gold R WG                                                         |
| 63         | Quantum R-OK                                                              |
| 71         | Treatment for noctuids                                                    |
| 72         | K <sub>2</sub> SO <sub>4</sub>                                            |
| 82         | UAV flight                                                                |
| 90         | Harvest                                                                   |

**Table S2.** Vegetation and bioristor based indices. Green highlight the Micro ground/plant scale, Blight Blue the medium proximal scale, gray and yellow the macro aerial scale.

| Scales             | Index | Index Description                            | Bioristor Based Index | RGB Based Index | Thermal Based Index | Multispectral Based Index | References |
|--------------------|-------|----------------------------------------------|-----------------------|-----------------|---------------------|---------------------------|------------|
| Micro ground/plant | R     | Sensor response                              |                       |                 |                     |                           | [13,50,58] |
| Medium Proximal    | GA    | Green Area                                   |                       |                 |                     |                           | [28]       |
| Medium Proximal    | GGA   | Greener Area                                 |                       |                 |                     |                           | [28]       |
| Medium Proximal    | CSI   | Crop Stress Index                            |                       |                 |                     |                           | [28]       |
| Macro Aerial       | CWSI  | Crop Water Stress Index                      |                       |                 |                     |                           | [70,83]    |
| Macro Aerial       | GNDVI | Green Normalized Difference Vegetation Index |                       |                 |                     |                           | [67]       |
| Macro Aerial       | NDRE  | Normalized Difference Red Edge Index         |                       |                 |                     |                           | [68]       |
| Macro Aerial       | NDVI  | Normalized Difference Vegetation Index       |                       |                 |                     |                           | [69]       |

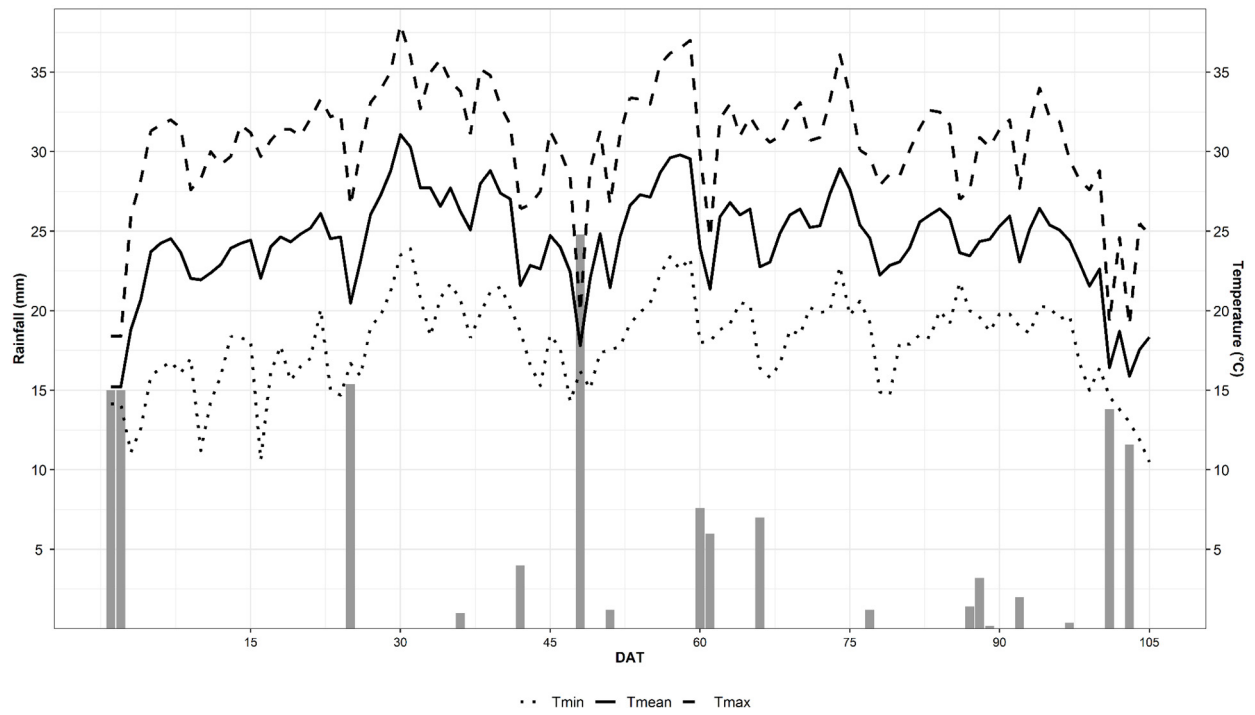

**Figure S1.** Environmental measurements. Daily rainfall, Mean Temperature, Temperature minimum (Tmin °C), Temperature maximum (Tmax °C).

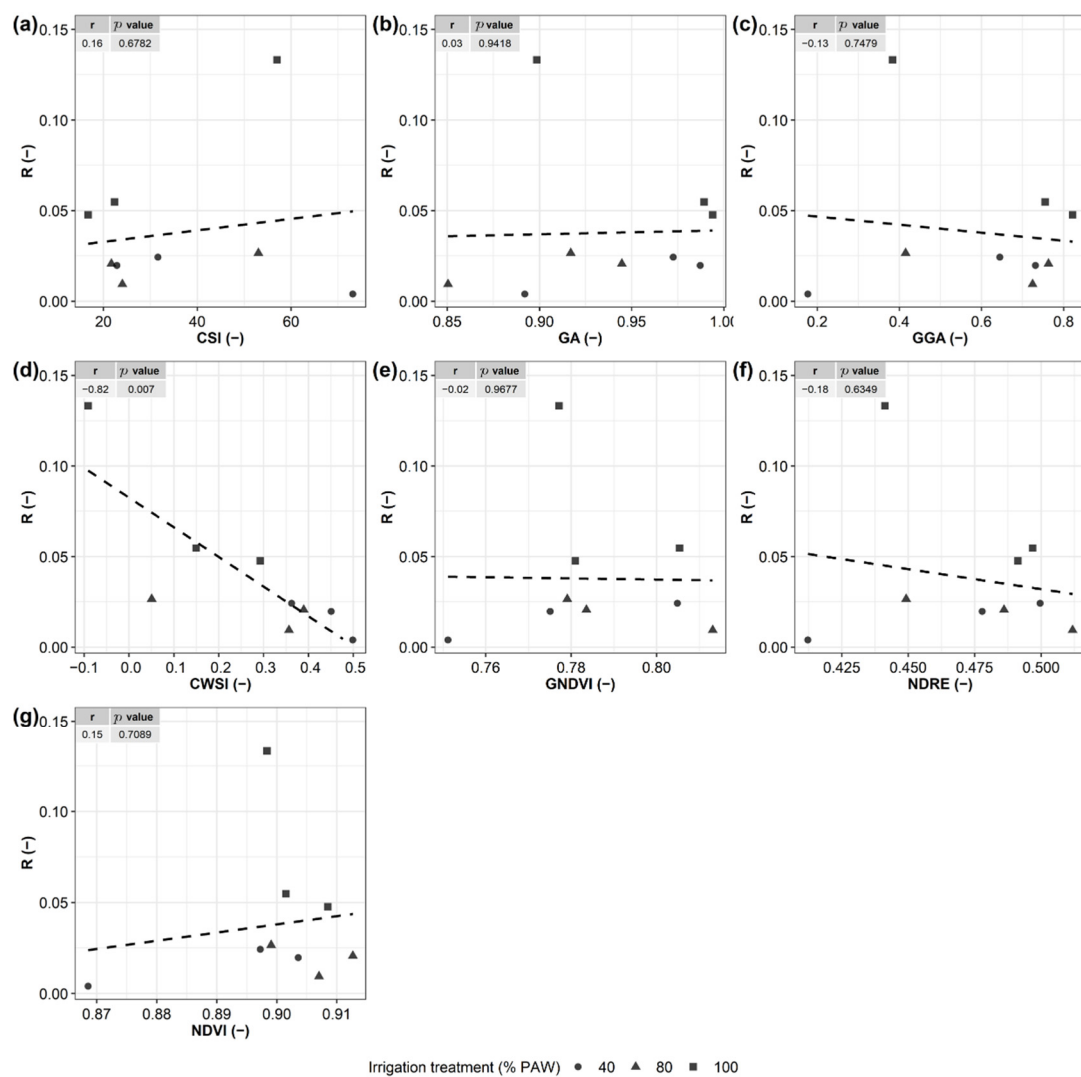

**Figure S2.** Correlation Plot between multiscale-acquired indices. Sensor response ( $R$ ) and (a) CSI, (b) GA (c) GGA, (d) CWSI, (e) GNDVI, (f) NDRE, (g) NDVI.

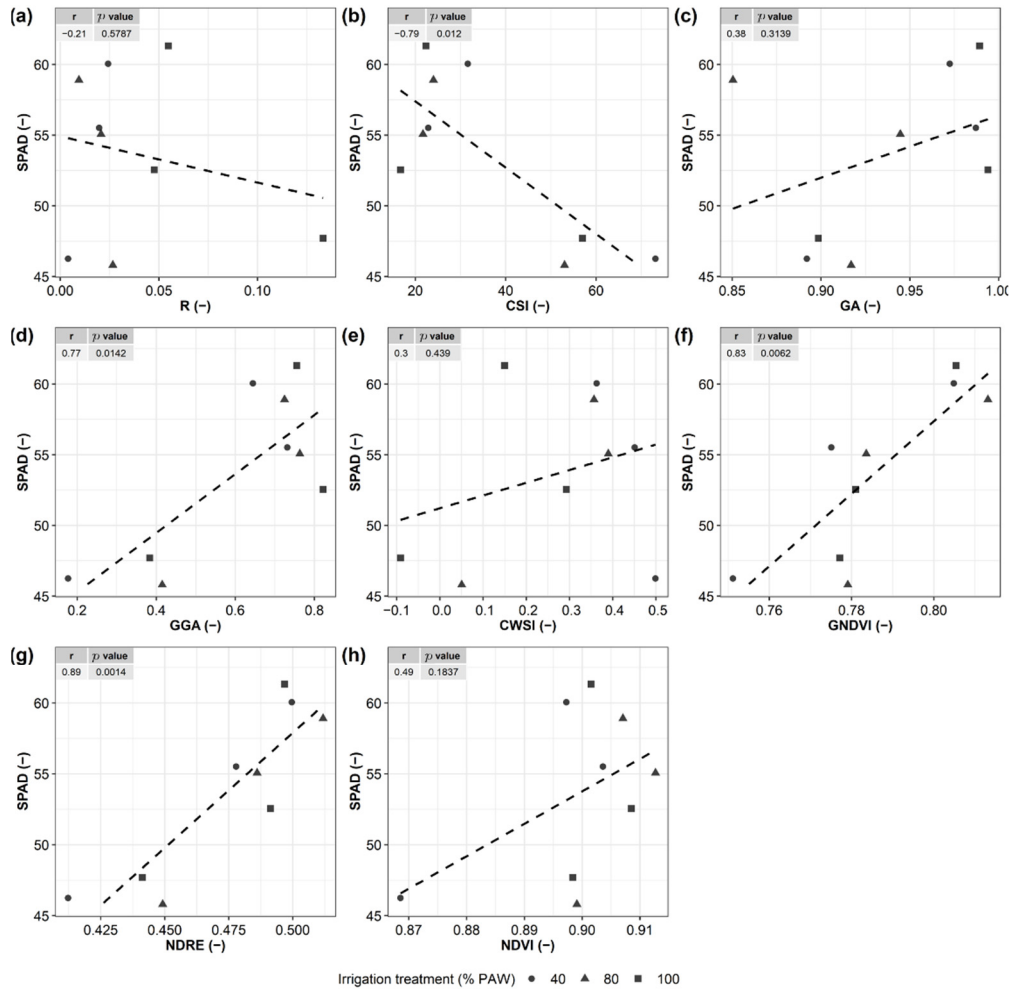

**Figure S3.** Correlation plot between the SPAD index and (a) R, (b) CSI, (c) GA (d) GGA, (e) CWSI, (f) GNDVI, (g) NDRE, (h) NDVI.

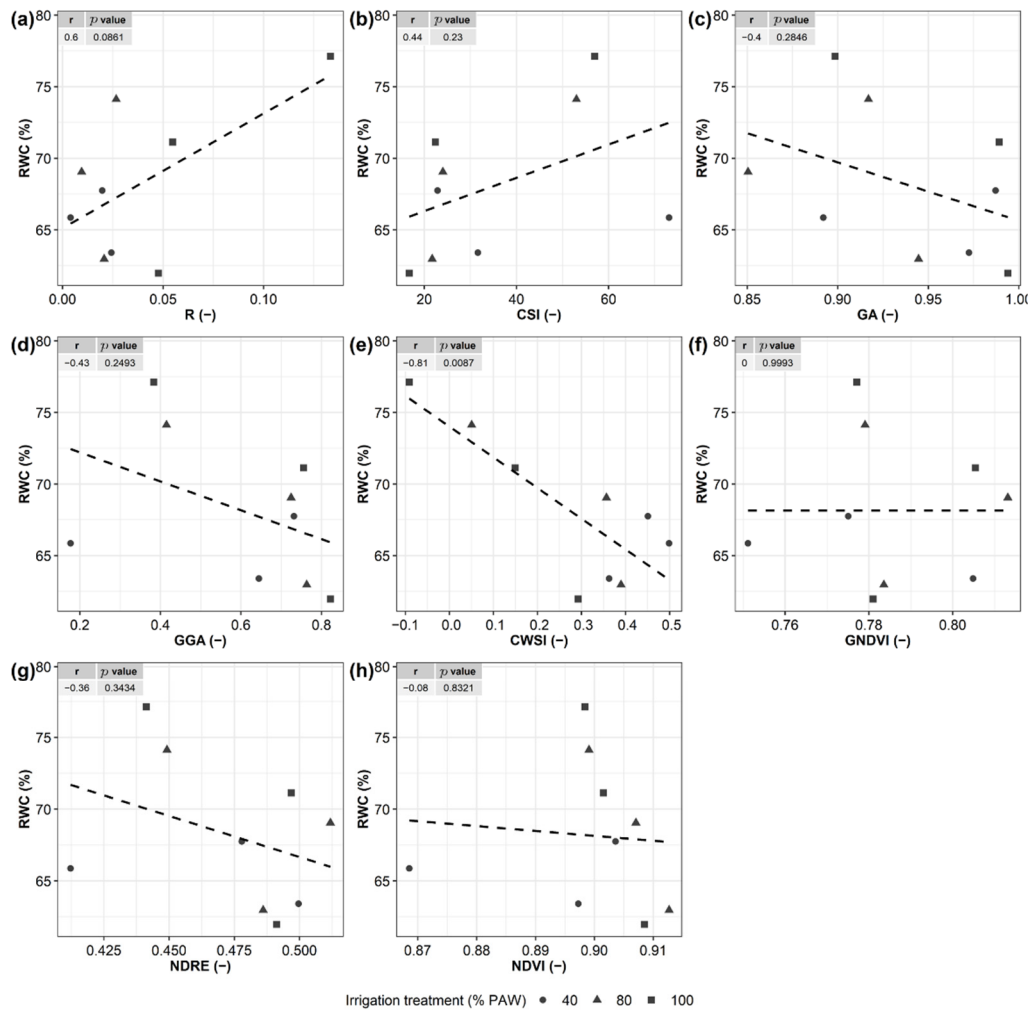

**Figure S4.** Correlation plot between the RWC and (a) R, (b) CSI, (c) GA (d) GGA, (e) CWSI, (f) GNDVI, (g) NDRE, (h) NDVI.
